# Supplementary material for: Synthesis and characterisation of a novel europium(iii)-containing heptaisobutyl-POSS
Source: Royal Society of Chemistry journal article supplement (doi:10.1039/c4nj00157e), 2014-01-01
Supplement: c4nj00157e1.pdf [file c4nj00157e1.pdf]

## Supporting Information

### Synthesis and characterisation of a novel Europium(III)-containing heptaisobutyl- POSS

Stefano Marchesi, Fabio Carniato and Enrico Boccaleri\*

Dipartimento di Scienze e Innovazione Tecnologica, Interdisciplinary Center Nano-Sistemi, Università  
del Piemonte Orientale, V.le Teresa Michel, 11, 15121, Alessandria, Italy,

Fax: (+)39 0131-360250; Tel: +390131260264

E-mail: [enrico.boccaleri@mfn.unipmn.it](mailto:enrico.boccaleri@mfn.unipmn.it)

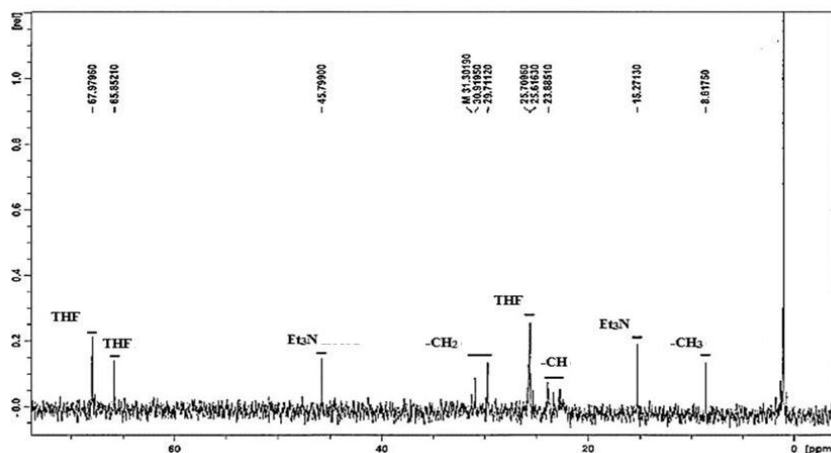

Figure S1. <sup>13</sup>C-NMR spectrum of Eu(III)-POSS in CDCl<sub>3</sub> solvent.

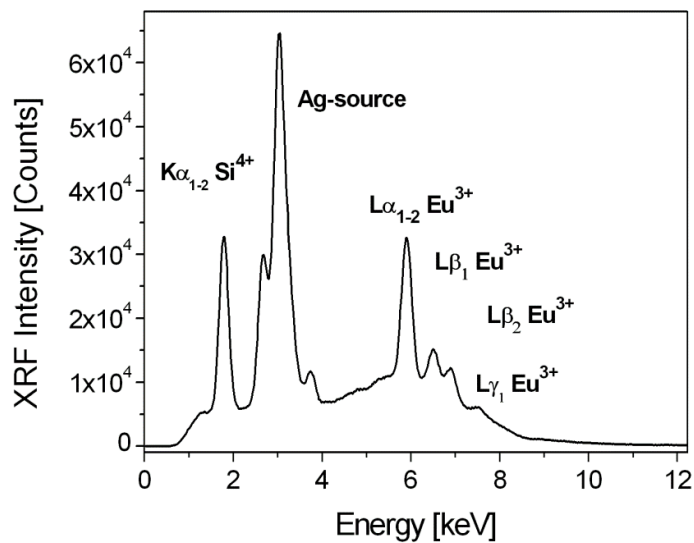

**Figure S2.** XRF analysis of Eu(III)-POSS sample.

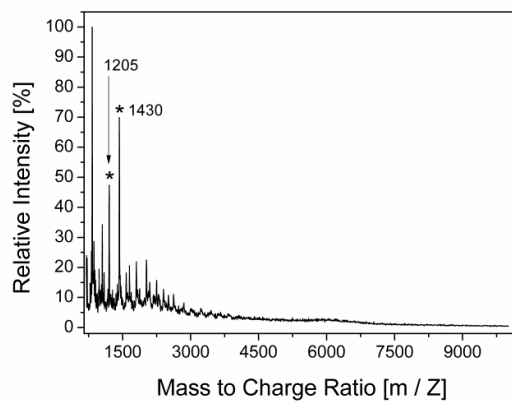

**Figure S3.** Mass spectrum of Eu(III)-POSS, incorporated in a resin of sinapinic acid.

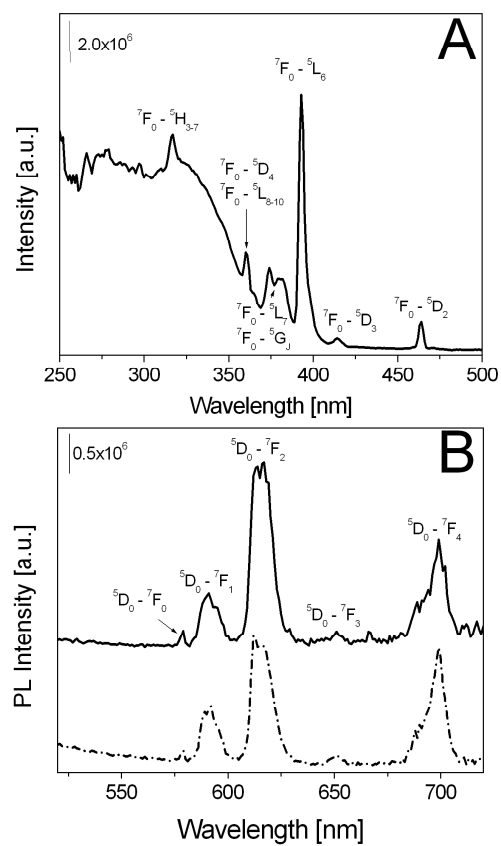

**Figure S4.** A) Excitation spectrum of Eu(III)-POSS at the solid state around the most intense emission line of  $\text{Eu}^{3+}$  at  $\lambda_{\text{em}} = 615 \text{ nm}$ ; B) emission spectra of Eu(III)-POSS under irradiation at 320 nm (solid curve) and 395 nm (dash line).
